# Supplementary material for: TACTILE EDGES AND MOTION VIA PATTERNED MICROSTIMULATION OF THE HUMAN CORTEX
Source: bioRxiv or medRxiv preprint supplement (doi:10.1101/2024.05.06.24306627), 2024-05-07
Supplement: Supplementary file [file media-1.pdf]

# SUPPLEMENTARY INFORMATION

## TACTILE EDGES AND MOTION VIA PATTERNED MICROSTIMULATION OF THE HUMAN CORTEX

Giacomo Valle<sup>1,¥</sup>, Ali H. Alamari<sup>2</sup>, Robin Lienkämper<sup>3</sup>, John E. Downey<sup>1</sup>, Anton R. Sobinov<sup>1</sup>, Linnea J. Endsley<sup>1</sup>, Dillan Prasad<sup>1</sup>, Michael L. Boninger<sup>3,4,5</sup>, Jennifer L. Collinger<sup>3,4,5</sup>, Peter C. Warnke<sup>6</sup>, Nicholas G. Hatsopoulos<sup>1,2,7</sup>, Lee E. Miller<sup>8,9,10,11</sup>, Robert A. Gaunt<sup>3,4,5</sup>, Charles M. Greenspon<sup>1,†</sup>, Sliman J. Bensmaia<sup>1,2,7,†</sup>

<sup>1</sup> Department of Organismal Biology and Anatomy, University of Chicago, Chicago, IL.

<sup>2</sup> Committee on Computational Neuroscience, University of Chicago, Chicago, IL.

<sup>3</sup> Rehab Neural Engineering Labs, University of Pittsburgh, Pittsburgh, PA.

<sup>4</sup> Department of Physical Medicine and Rehabilitation, University of Pittsburgh, Pittsburgh, PA.

<sup>5</sup> Department of Bioengineering, University of Pittsburgh, Pittsburgh, PA.

<sup>6</sup> Department of Neurological Surgery, University of Chicago, Chicago, IL.

<sup>7</sup> Neuroscience Institute, University of Chicago, Chicago, IL.

<sup>8</sup> Department of Neuroscience, Northwestern University, Chicago, IL.

<sup>9</sup> Department of Biomedical Engineering, Northwestern University, Evanston, IL.

<sup>10</sup> Department of Physical Medicine and Rehabilitation, Northwestern University, Chicago, IL.

<sup>11</sup> Shirley Ryan Ability Lab, Chicago, IL.

¥For correspondence: [vallegiacomo@gmail.com](mailto:vallegiacomo@gmail.com)

†Equal contribution

### List of Supplementary Materials:

Movies S1: Tactile edge encoding, C1 and C2.

Movies S2: Tactile curvature encoding, C1.

Movies S3: 3D structures from multidigit tactile edges, C1.

Movies S4: Apparent motion encoding, C1 and C2.

Movies S5: Dynamic voltage field shaping, C1.

Movies S6: Speed of motion encoding, C1.
